# Supplementary material
Source: publisher site journal article supplement (https://edge.sagepub.com/system/files/skaggs_1e_test_dev_appendix_a_0.pdf)
Supplement: Supplementary file 1 [file skaggs_1e_test_dev_appendix_a_0.pdf]

## APPENDIX A

---

# GUIDE TO SAMPLE DATA SETS

TIMSS 2003 8th Grade Mathematics, Booklet 1, US Sample

The data can be found in the excel file: TIMMS 2003 Math data—booklet 1.xlsx

The text and information for the items can be found at: [https://timssandpirls.bc.edu/PDF/T03\\_RELEASED\\_M8.pdf](https://timssandpirls.bc.edu/PDF/T03_RELEASED_M8.pdf)

CIRP Political Viewpoint Data

The data can be found in the excel file: political viewpoint data.xlsx

The survey itself can be found at: <https://www.heri.ucla.edu/researchers/instruments/CIRP/1999SIF.pdf>

The excel file contains data from items 1, 28, and 31. The data come from a random sample of incoming freshmen at a higher education institution.
